# Supplementary material for: Whole cell response to receptor stimulation involves many deep and distributed subcellular processes
Source: bioRxiv or medRxiv preprint supplement (doi:10.1101/462200), 2019-04-07

**Molecular Biology of the Cell**  
Cellular communication  
HU210

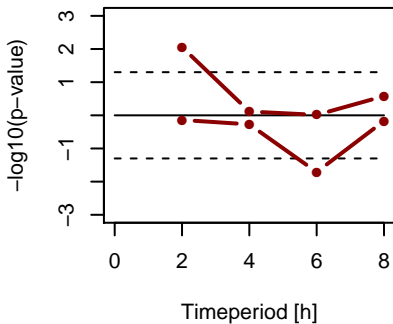

**Molecular Biology of the Cell**  
Chromatin and histone dynamics  
HU210

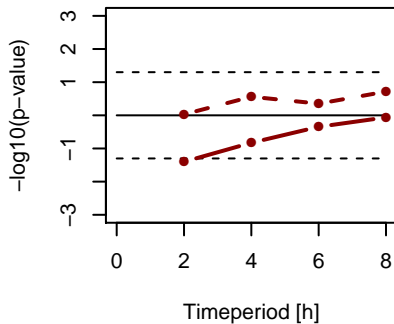

**Molecular Biology of the Cell**  
Gene expression  
HU210

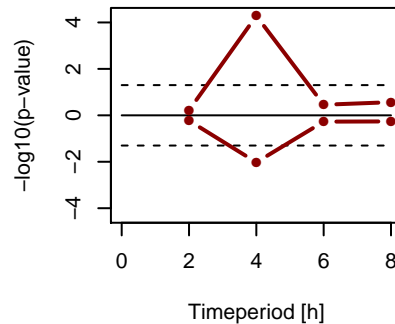

**Molecular Biology of the Cell**  
Intracellular degradation pathways  
HU210

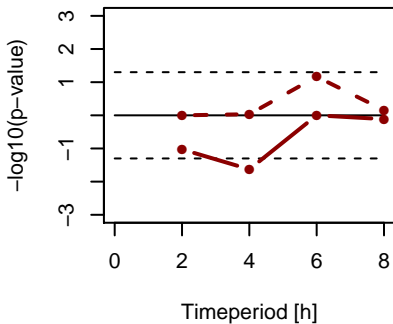

**Molecular Biology of the Cell**  
Intracellular vesicle traffic  
HU210

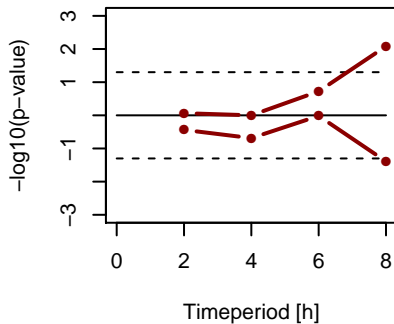

**Molecular Biology of the Cell**  
Organelle organization  
HU210

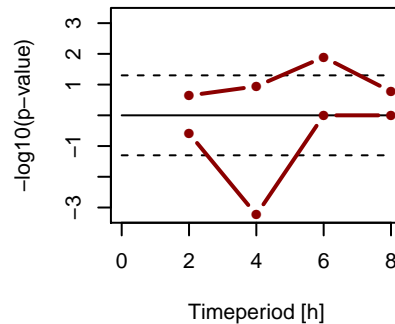

**Molecular Biology of the Cell**  
Posttranslational protein modification  
HU210

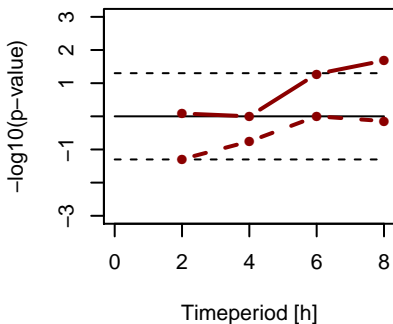

**Molecular Biology of the Cell**  
Regulated cell death  
HU210

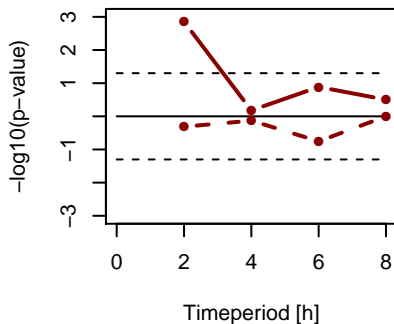

**Molecular Biology of the Cell**  
Structural mitochondria organization  
HU210

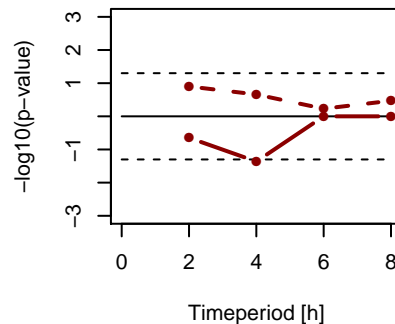

**Molecular Biology of the Cell**  
Transmembrane protein import and translocation  
HU210

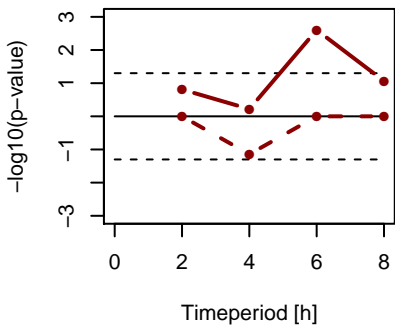

**Cell cycle and cell division**  
Cytokinesis  
HU210

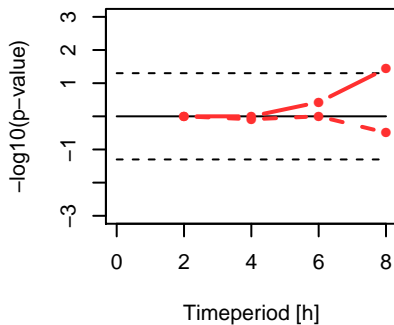

**Cellular communication**  
Epidermal growth factor family signaling  
HU210

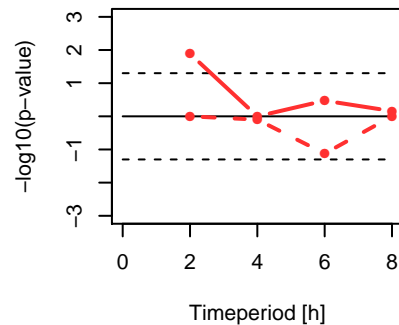

**Cellular communication**  
Interferon signaling  
HU210

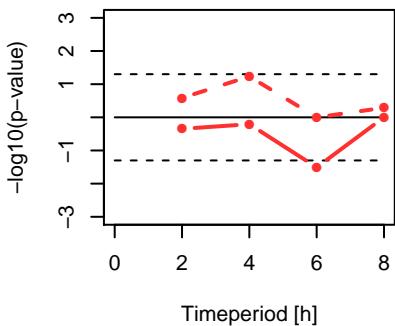

**Cellular communication**  
signaling pathways that control cell proliferation and differ  
HU210

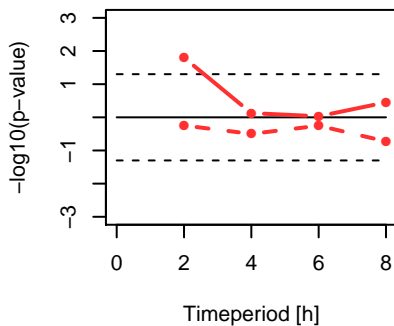

**Cellular communication**  
TGF-beta superfamily signaling  
HU210

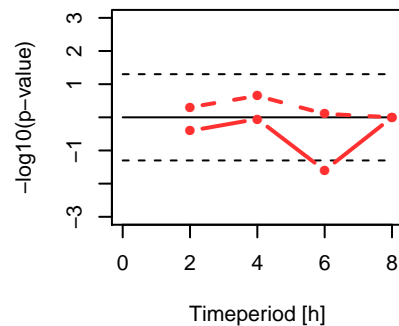

**Cellular protrusion organization**  
Eukaryotic cilium and flagellum organization  
HU210

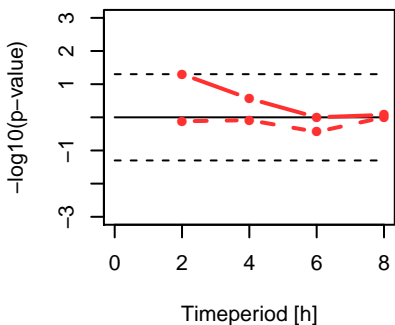

**Cellular response to stress**  
Cellular response to radiation  
HU210

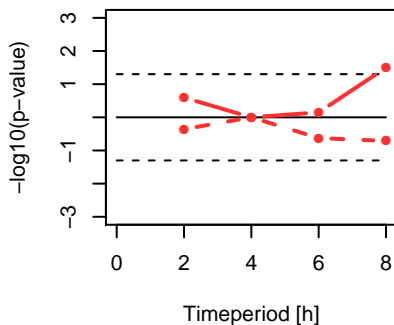

**Chromatin and histone dynamics**  
Chromatin remodeling  
HU210

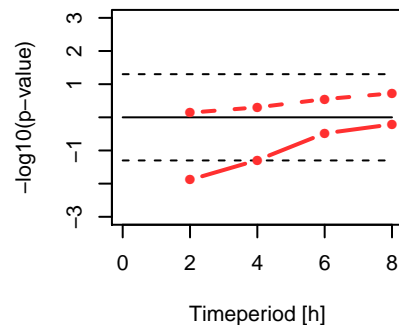

**Coagulation cascade, complement system and blood protein**  
Coagulation cascade and its regulation  
HU210

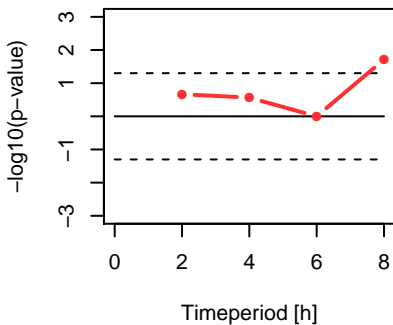

**DNA replication, recombination and repair**  
DNA double-strand break repair  
HU210

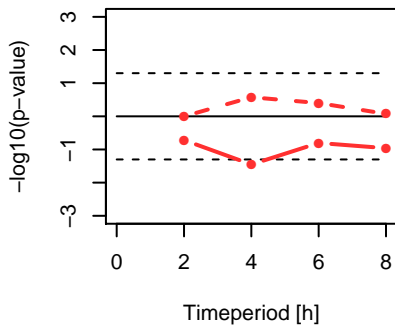

**Gene expression**  
Pre-mRNA splicing  
HU210

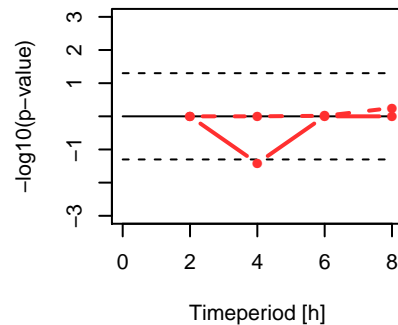

**Gene expression**  
Ribonucleoprotein biogenesis  
HU210

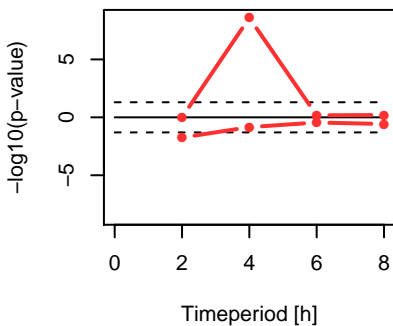

**Gene expression**  
RNA surveillance and degradation  
HU210

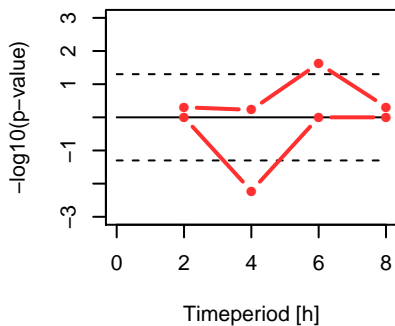

**Intracellular degradation pathways**  
Ubiquitin mediated proteasomal degradation  
HU210

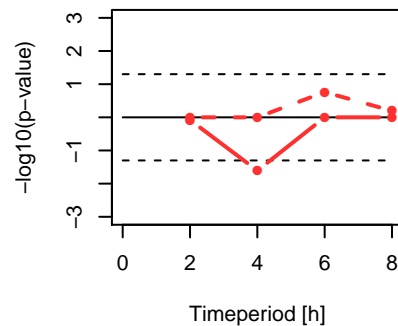

**Intracellular vesicle traffic**  
Vesicle exocytosis  
HU210

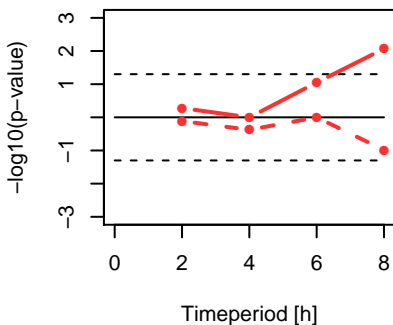

**Intracellular vesicle traffic**  
Vesicle traffic between TGN and endosome  
HU210

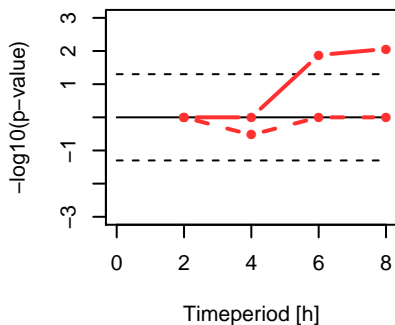

**Lipid metabolism**  
Membrane lipid metabolism  
HU210

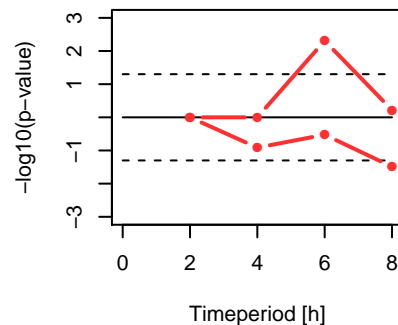

**Organelle organization**Endoplasmic reticulum and nuclear envelope organization  
HU210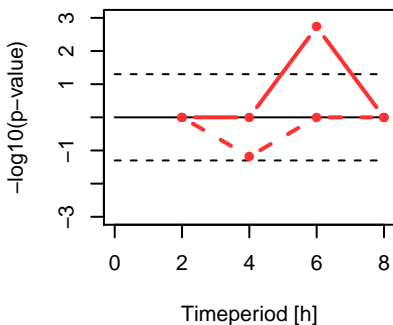**Organelle organization**Interphase nucleus and nuclear chromatin organization  
HU210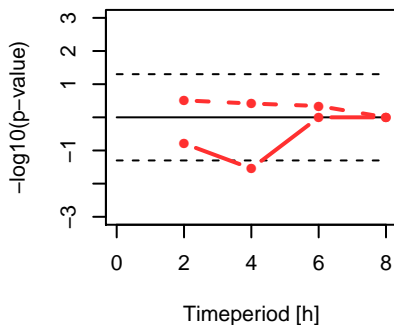**Organelle organization**Structural golgi apparatus organization  
HU210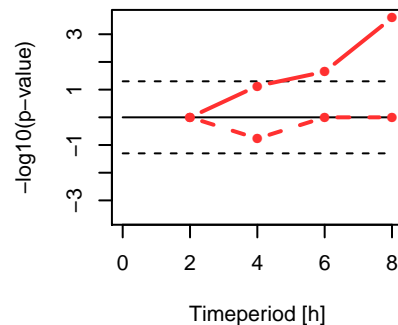**Posttranslational protein modification**Post-translational protein modification in Mitochondria  
HU210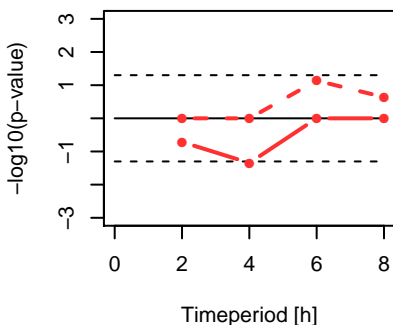**Posttranslational protein modification**Protein prenylation  
HU210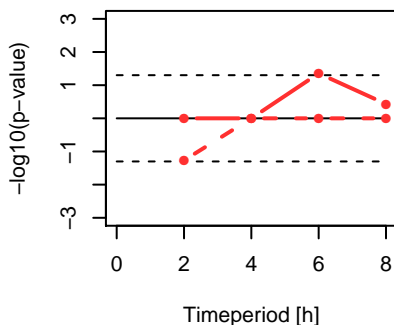**Regulated cell death**Apoptosis  
HU210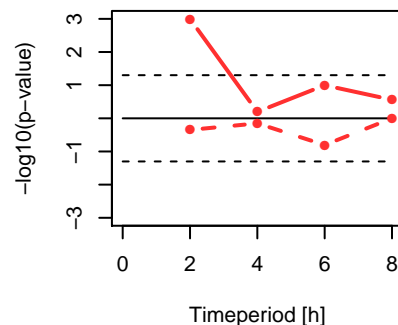**Transmembrane protein import and translocation**Endoplasmic reticulum membrane protein insertion and insertion  
HU210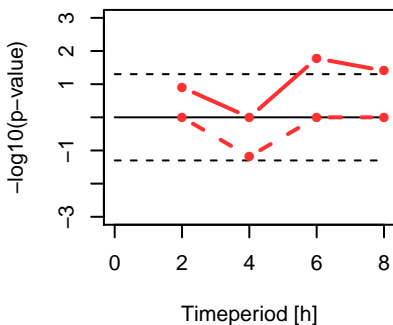**Transmembrane protein import and translocation**Protein transport across the nuclear membrane  
HU210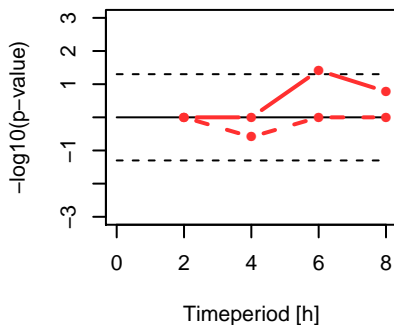**Actin filament dynamics**Actin polymerization  
HU210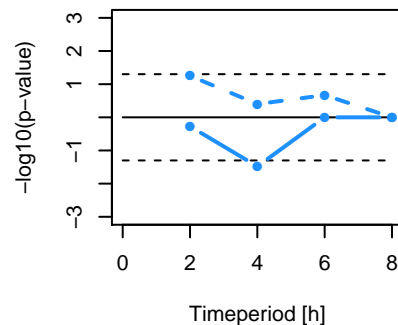

**Ammonium metabolism**Amination of  $\alpha$ -keto acids and deamination of amino  
HU210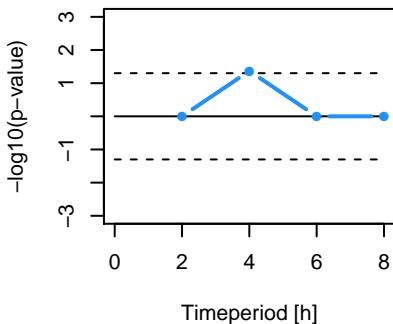**Amyloid generation and aggregation**Amyloid generation and aggregation, amyloid degradation and  
HU210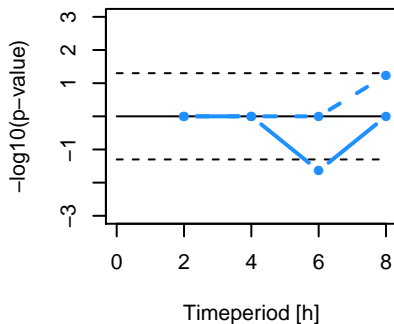**Chromatin remodeling**Nucleosome disassembly  
HU210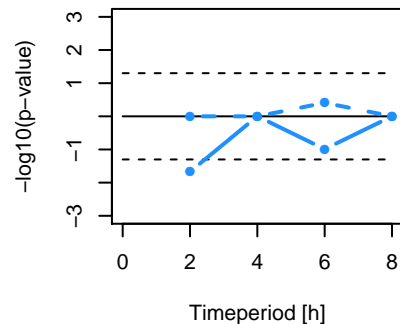**Chromosome segregation by mitotic spindle**Mitotic chromosome condensation  
HU210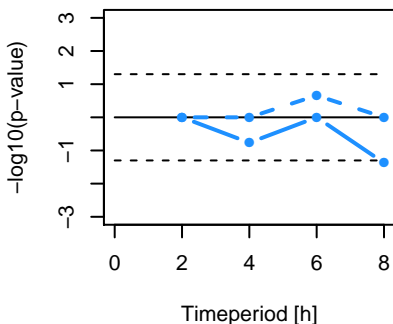**Chromosome segregation by mitotic spindle**Mitotic H3 phosphorylation  
HU210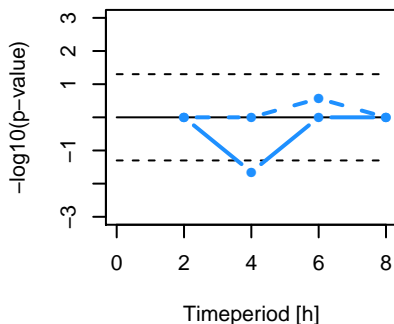**Collagen biosynthesis**Collagen fibril organization by fibril-associated bridges  
HU210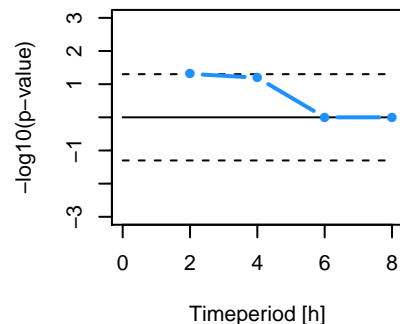**Collagen biosynthesis**Procollagen processing in the ER  
HU210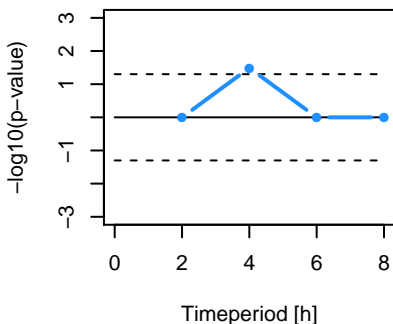**Complement pathway and regulation**Classical complement pathway  
HU210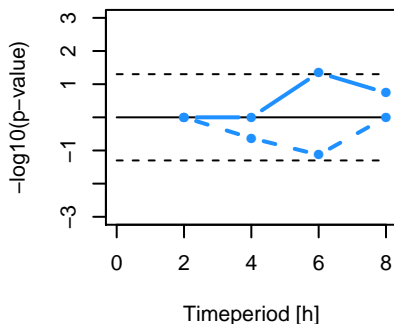**Control of postsynaptic potential**Glutamate-mediated control of postsynaptic potential  
HU210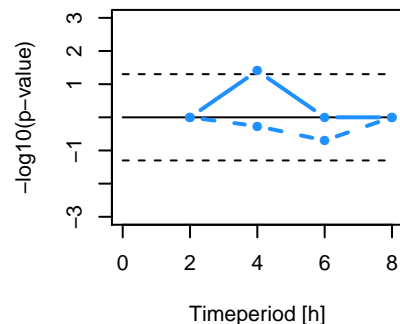

**Cytokinesis**  
Equatorial RhoA activation  
HU210

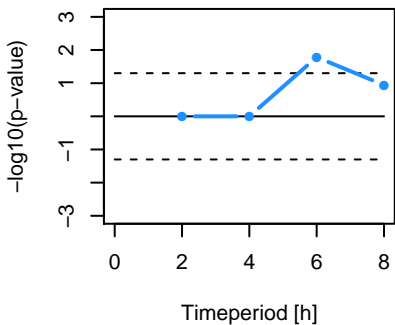

**Cytoplasmic post-translational protein modification**  
Cytoplasmic protein folding  
HU210

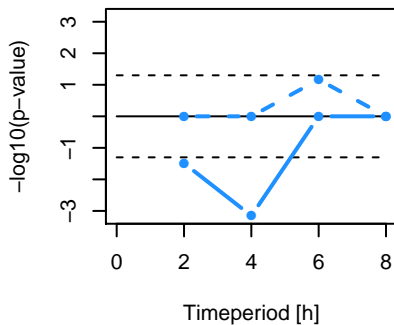

**DNA double-strand break repair**  
Homologous recombination DSB repair  
HU210

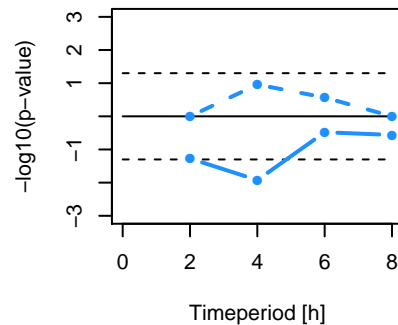

**DNA interstrand cross-links repair**  
Fanconi anemia interstrand cross-link repair pathway  
HU210

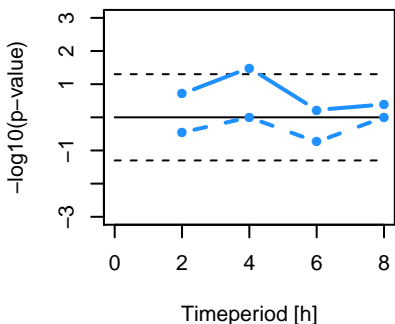

**Elastogenesis**  
Elastin cross-linking and assembly  
HU210

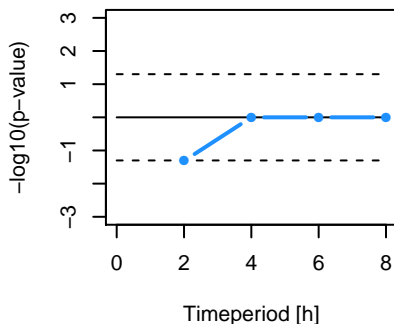

**Endocytic pathway**  
Clathrin-mediated endocytosis  
HU210

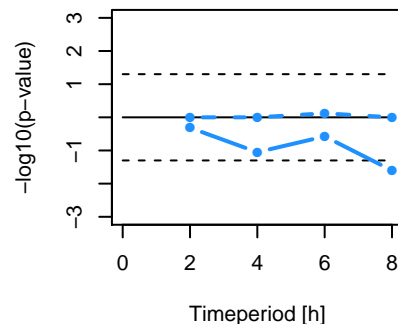

**Endoplasmic reticulum and nuclear envelope organization**  
Endoplasmic reticulum tubulus maintenance  
HU210

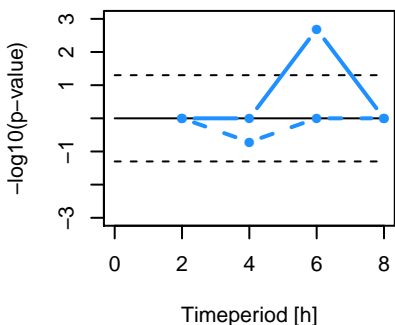

**Eukaryotic DNA replication**  
DNA cleavage  
HU210

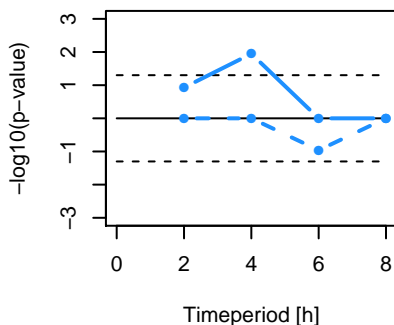

**Filopodium and lamellipodium organization**  
Lamellipodium organization  
HU210

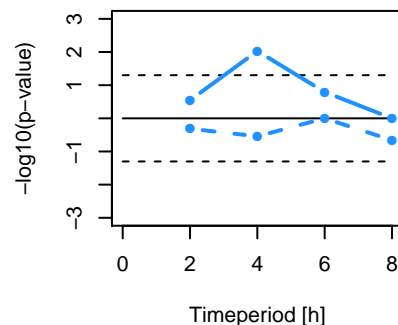

**Free radical generation for respiratory burst**  
Free radical generation by NADPH oxidase  
HU210

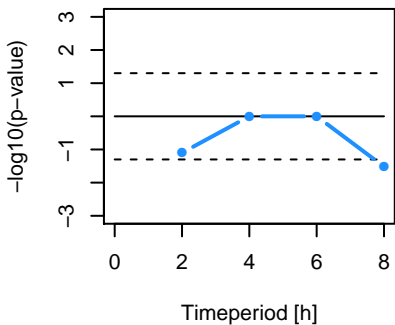

**Histone modification**  
Histone phosphorylation and dephosphorylation  
HU210

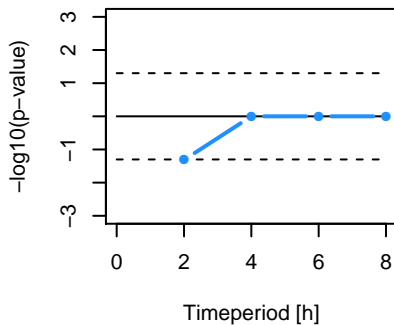

**Interleukin receptor signaling**  
Interleukin 2 receptor signaling  
HU210

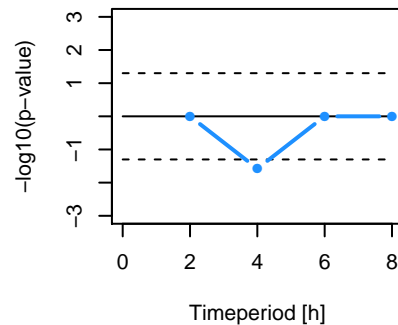

**Intracellular common signaling cascades of multiple path**  
CAM kinase signaling pathway  
HU210

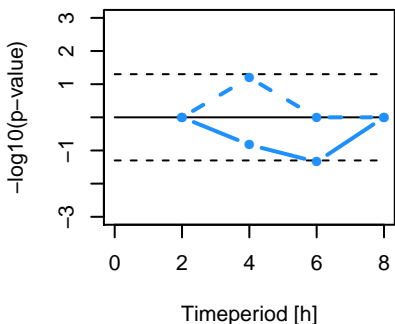

**Intracellular common signaling cascades of multiple path**  
Nitric oxide signaling pathway  
HU210

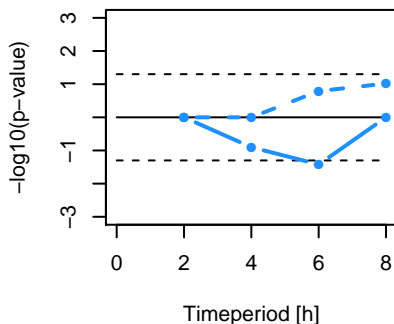

**Intracellular common signaling cascades of multiple path**  
PI3 kinase AKT signaling pathway  
HU210

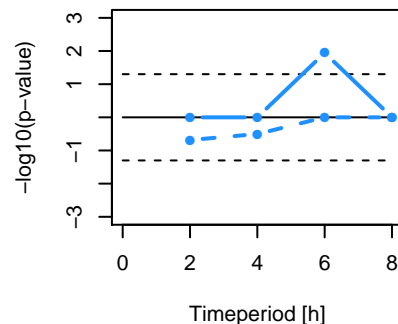

**Iron homeostasis**  
Cellular iron storage  
HU210

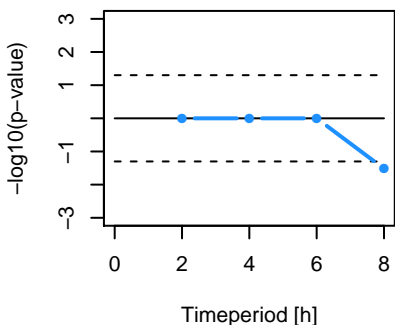

**Membrane lipid metabolism**  
Phosphoglyceride biosynthesis  
HU210

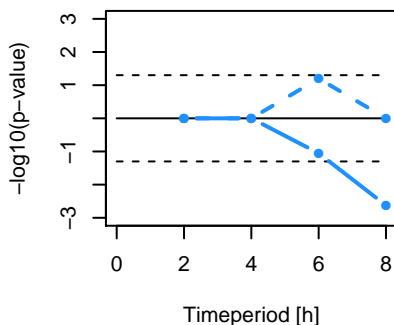

**Membrane lipid metabolism**  
Sphingolipid metabolism  
HU210

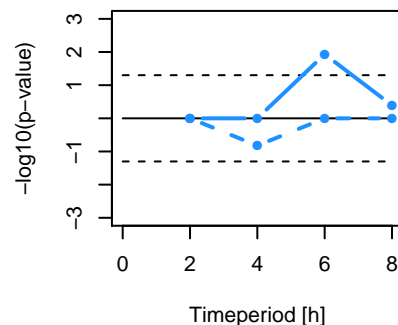

**Metabolism of non-essential amino acids**  
**Proline metabolism**  
**HU210**

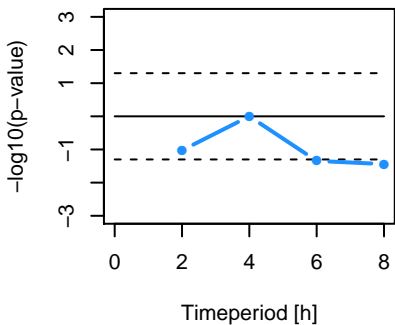

**Metabolism of purines and pyrimidines**  
**Pyrimidine synthesis and salvage**  
**HU210**

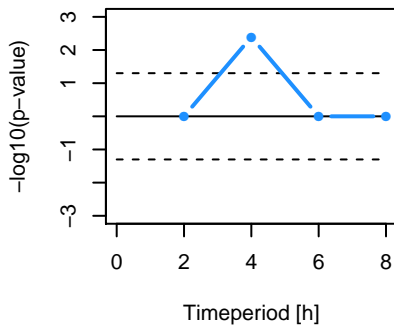

**Metabolism of water-soluble vitamins**  
**Vitamin C metabolism**  
**HU210**

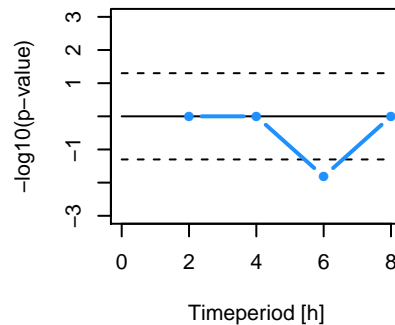

**Microtubule dynamics**  
**Microtubule crosslinking and bundling**  
**HU210**

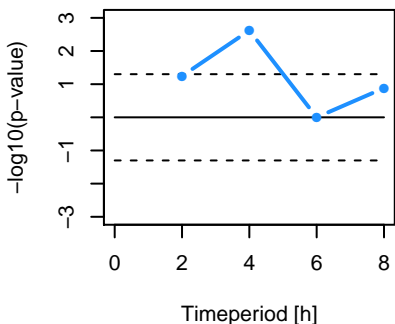

**Microtubule dynamics**  
**Microtubule depolymerization, severing and catastrophe**  
**HU210**

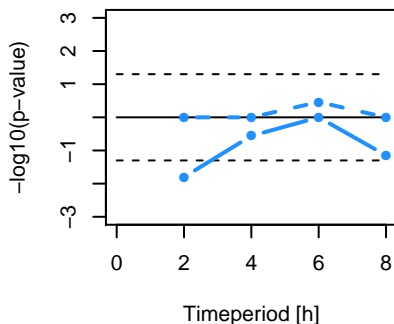

**Microtubule dynamics**  
**Microtubule plus-end tracking**  
**HU210**

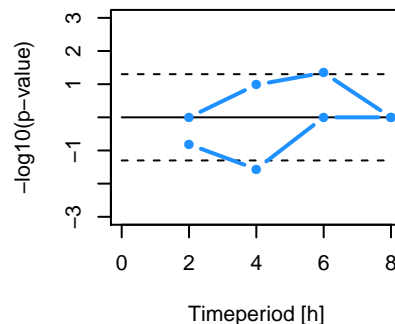

**Mitochondrial dynamics**  
**Mitochondrial fission**  
**HU210**

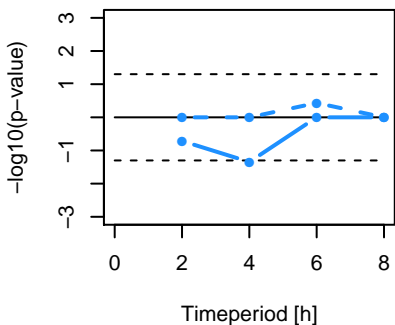

**Mitochondrial dynamics**  
**Mitochondrial fusion**  
**HU210**

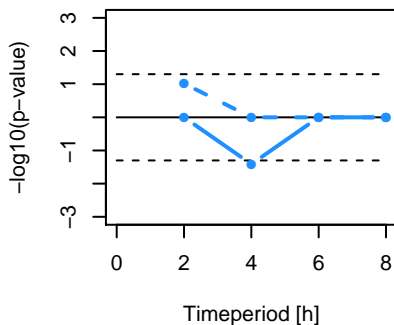

**Neuronal signaling pathways**  
**Brain derived neurotrophic factor receptor signaling**  
**HU210**

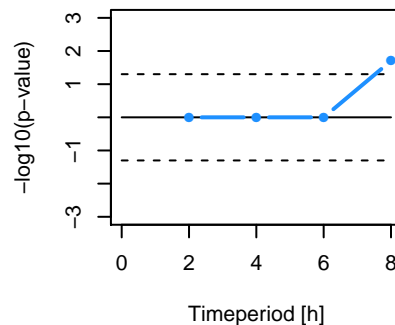



**Neuronal signaling pathways**  
Nerve growth factor receptor signaling  
HU210

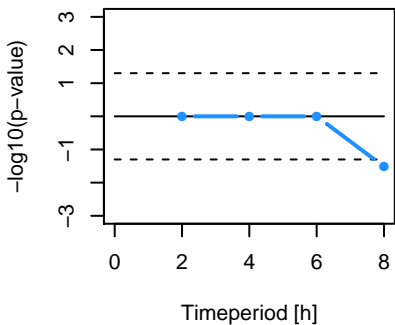

**Pattern recognition signaling**  
MDA-5 receptor signaling  
HU210

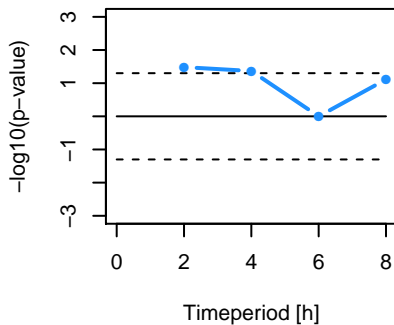

**Pattern recognition signaling**  
Toll-like receptor signaling  
HU210

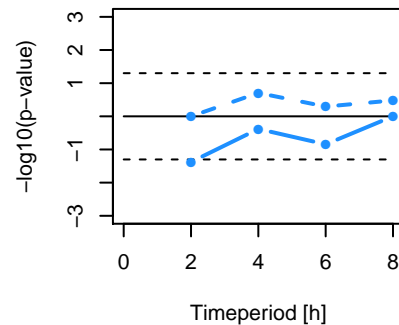

**Protein modification and quality control during biosynthesis**  
Chaperone mediated protein folding in ER  
HU210

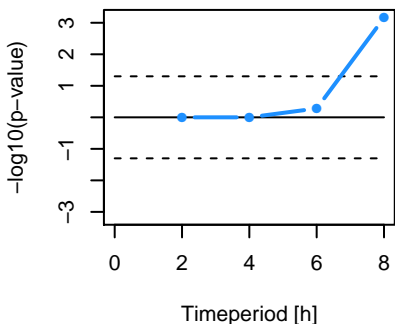

**Post-translational protein modification in Mitochondria**  
Protein folding in Mitochondria  
HU210

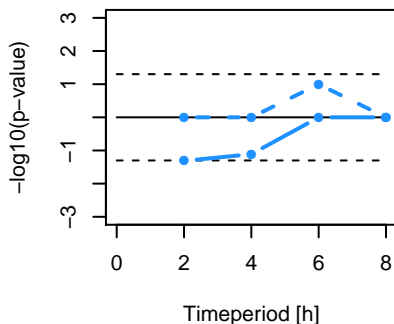

**Protein prenylation**  
Protein myristoylation  
HU210

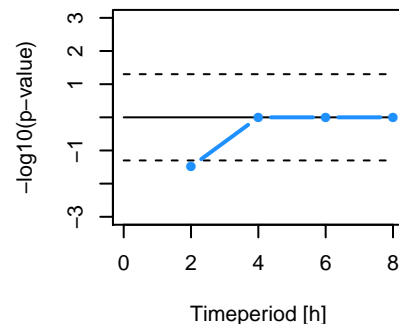

**Purinergic signaling**  
Purinergic P1 receptor signaling  
HU210

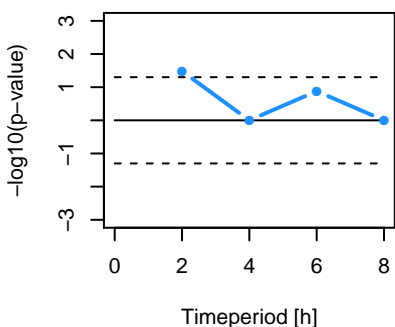

**Ribonucleoprotein biogenesis**  
Large ribosomal subunit organization  
HU210

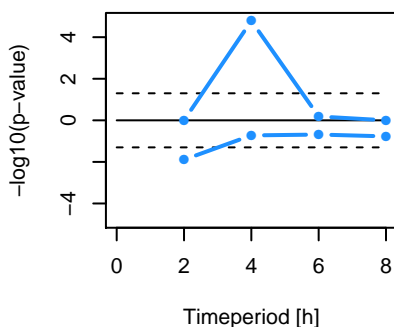

**Ribonucleoprotein biogenesis**  
Small ribosomal subunit organization  
HU210

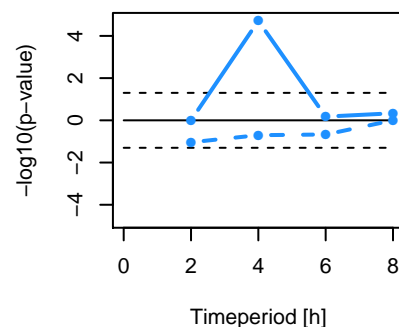

RNA surveillance and degradation  
Cytoplasmic RNA deadenylation  
HU210

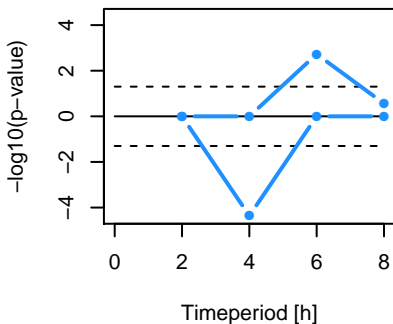

Signaling by extracellular matrix components  
Integrin receptor signaling  
HU210

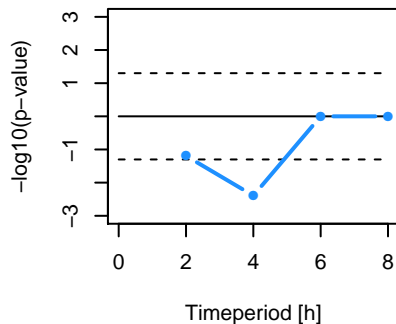

Signaling pathways involved in hematopoiesis  
Erythropoietin receptor signaling  
HU210

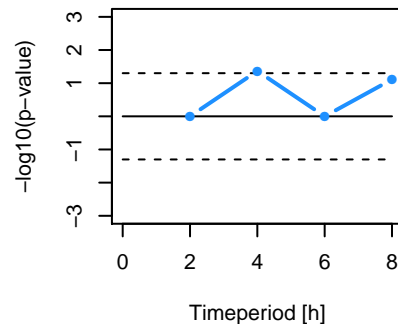

Signaling pathways involved in hematopoiesis  
Macrophage colony-stimulating factor receptor signaling  
HU210

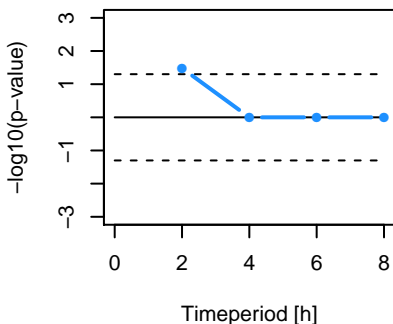

Signaling pathways involved in hematopoiesis  
Thrombopoietin receptor signaling  
HU210

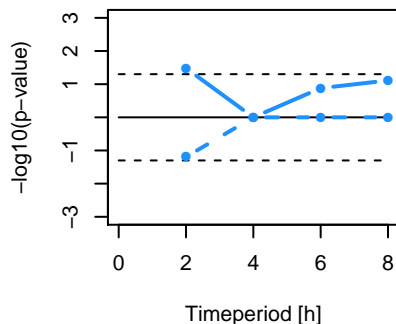

Signaling pathways that control cell proliferation and differentiation  
HIF-1 receptor signaling pathway  
HU210

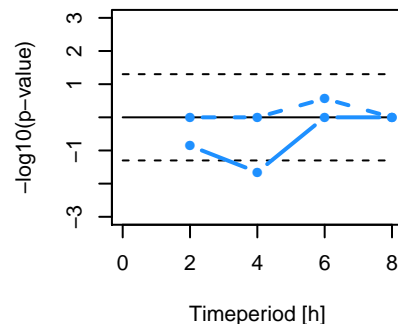

TGF-beta superfamily signaling  
Activin receptor signaling  
HU210

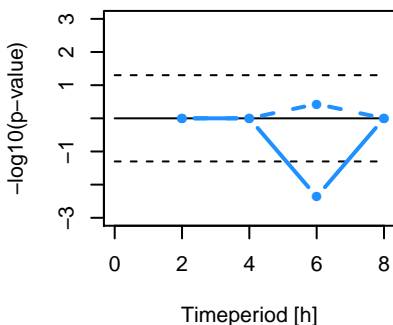

Transporters involved in membrane potential maintenance and ion transport not involved in membrane potential maintenance  
Bicarbonate transmembrane transport  
HU210

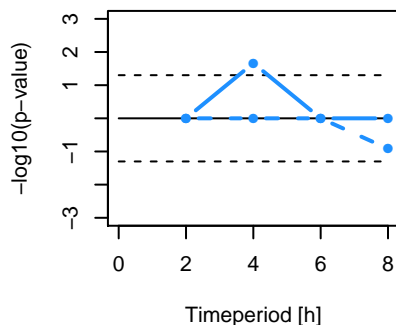

Transporters involved in membrane potential maintenance and ion transport not involved in membrane potential maintenance  
Copper transmembrane transport  
HU210

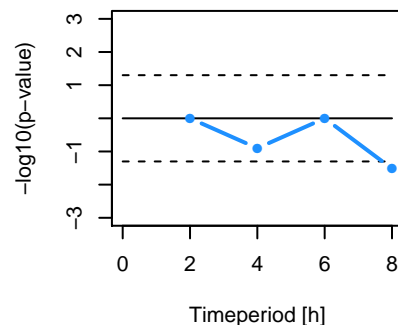

Triacylglycerol metabolism and transport  
Triacylglycerol hydrolysis and mobilization  
HU210

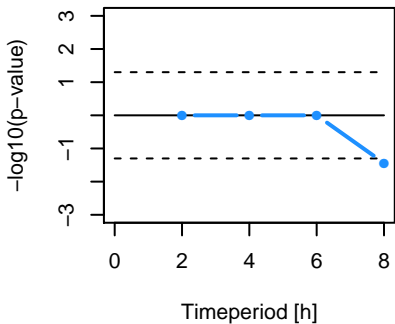

Vesicle exocytosis  
Vesicle tethering at plasma membrane  
HU210

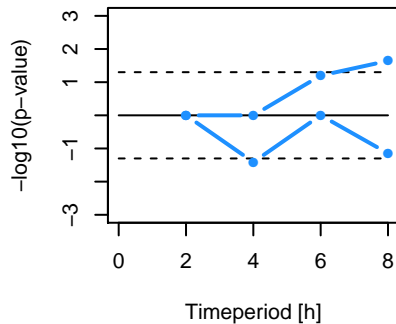

Vesicle traffic between TGN and endosome  
Retrograde vesicle traffic from endosome to TGN  
HU210

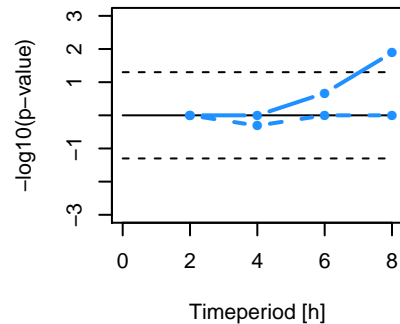

Supplement: Supplementary file [file 462200-4.pdf]
